# Supplementary material
Source: PubMed Central journal article supplement (PMC6063503)
Supplement: jci-128-98194-s039.pdf [file jci-128-98194-s039.pdf]

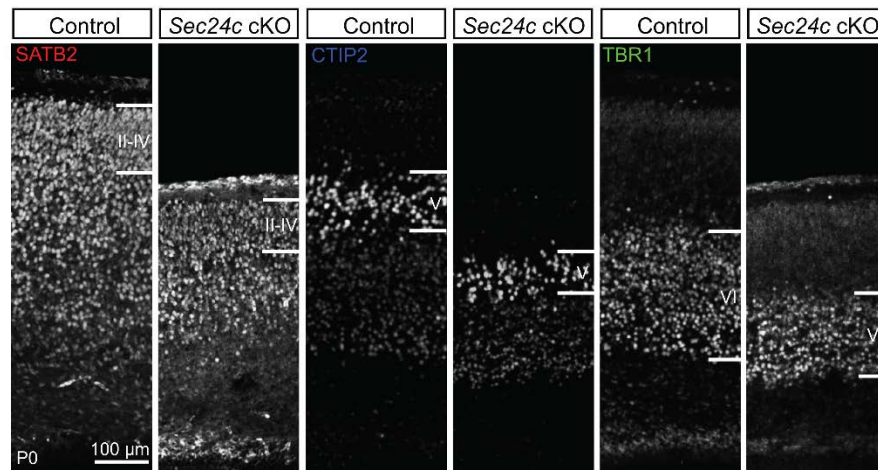

778

779

780

**Supplemental Figure 1. Related to Figure 2.** Expression patterns of SATB2, CTIP2, and TBR1 in cortices from control (n = 3) and *Sec24c*<sup>Nes</sup>-cKO (n = 3) mice at P0.

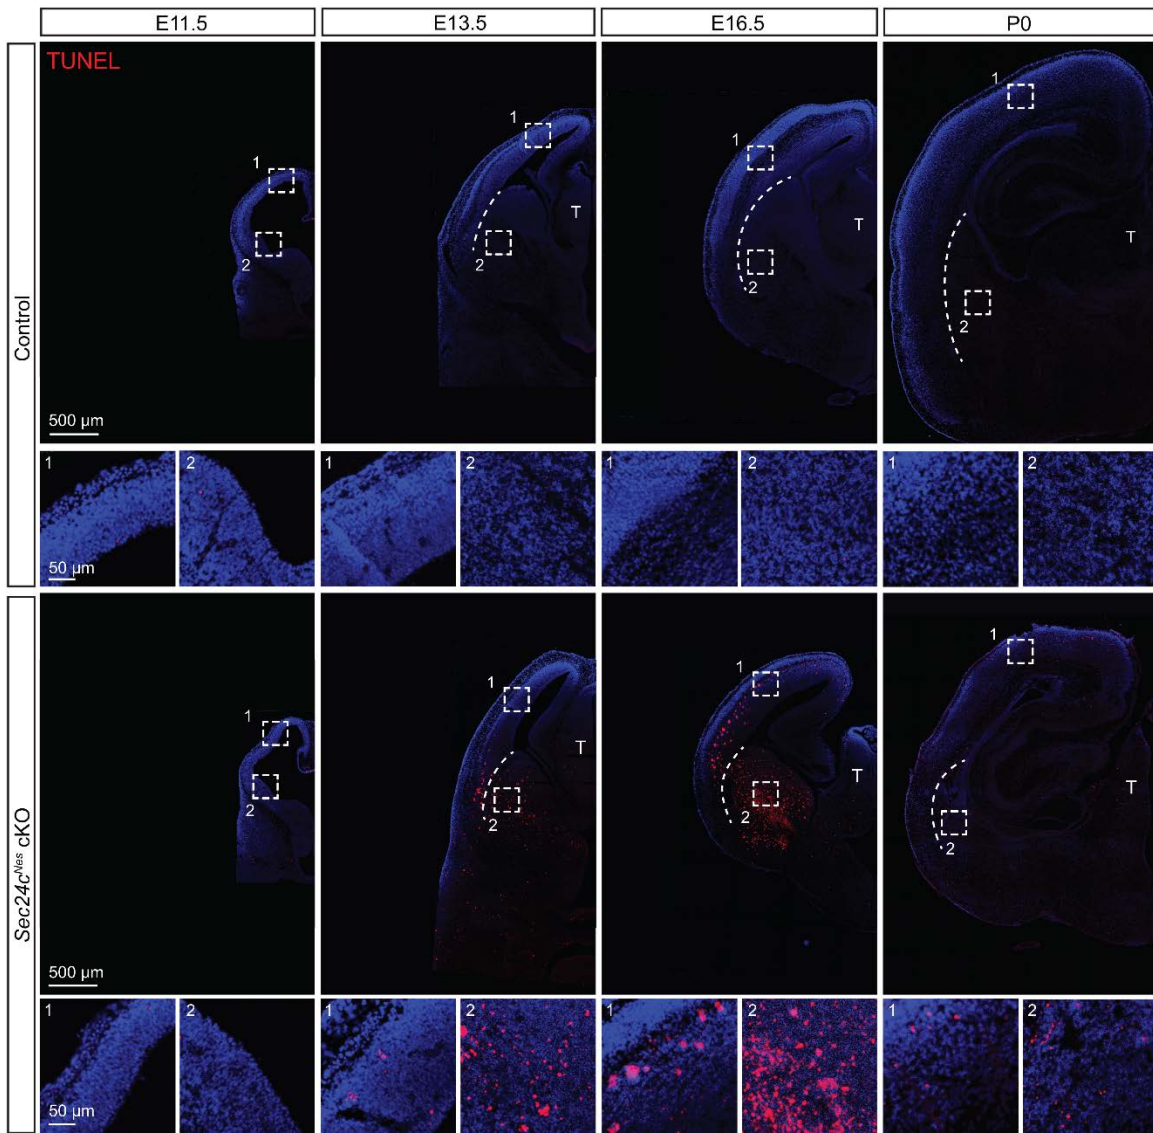

**Supplemental Figure 2. Related to Figure 3.** TUNEL assay on brain sections of control and *Sec24c*<sup>Nes-/-</sup> cKO mice at E11.5, E13.5, E16.5, and P0. Magnified areas from cortex (1) and striatum (2) are also shown. 3 mice were used for each genotype at each age. Abbreviation: T, thalamus.

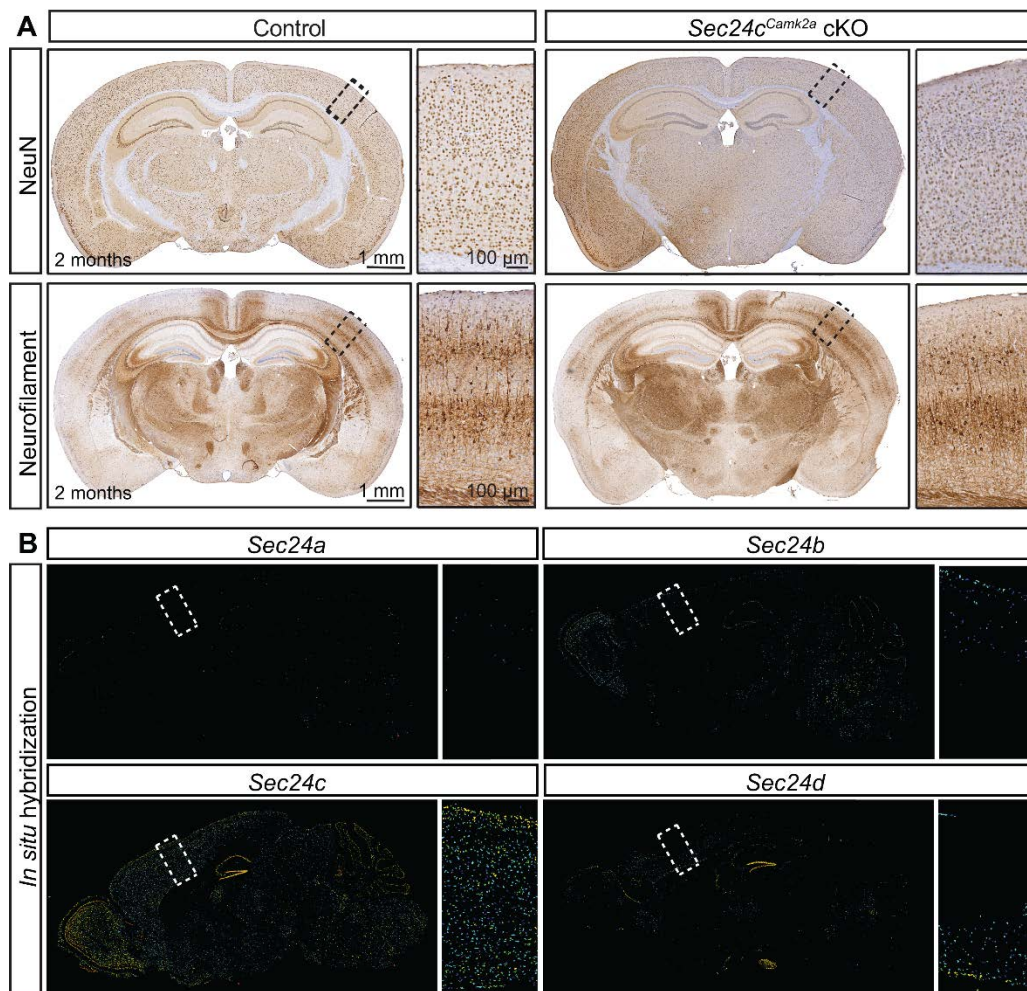

**Supplemental Figure 3. Related to Figure 5.** (A) Representative images of brain sections from 2-month-old controls (n = 2) and *Sec24c<sup>Camk2a</sup>*-cKO (n = 2) mice immunostained with antibodies against NeuN or neurofilament. (B) Expression density maps of *Sec24a*, *Sec24b*, *Sec24c*, and *Sec24d* mRNA in the brains of 8-week-old WT C57BL/6 mice (from Allen Brain Atlas: <http://www.brain-map.org/>).

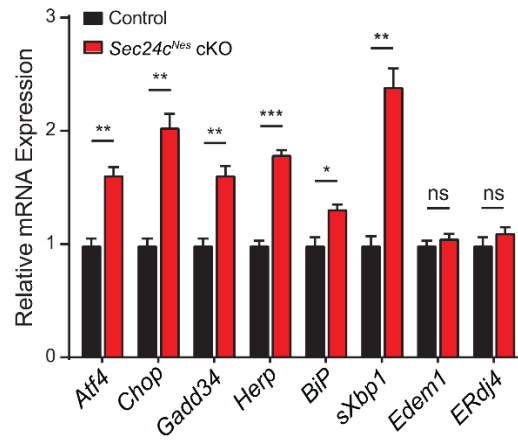

**Supplemental Figure 4. Related to Figure 6.** Relative levels (mean + SEM) of select UPR genes in the cortices of control (n = 3) and *Sec24c<sup>Nes</sup>*-cKO (n = 3) mice at E13.5 by real-time RT-PCR. Abbreviations: ns, not significant. \* $P < 0.05$ ; \*\* $P < 0.01$ ; \*\*\* $P < 0.001$  (Student's *t*-test).

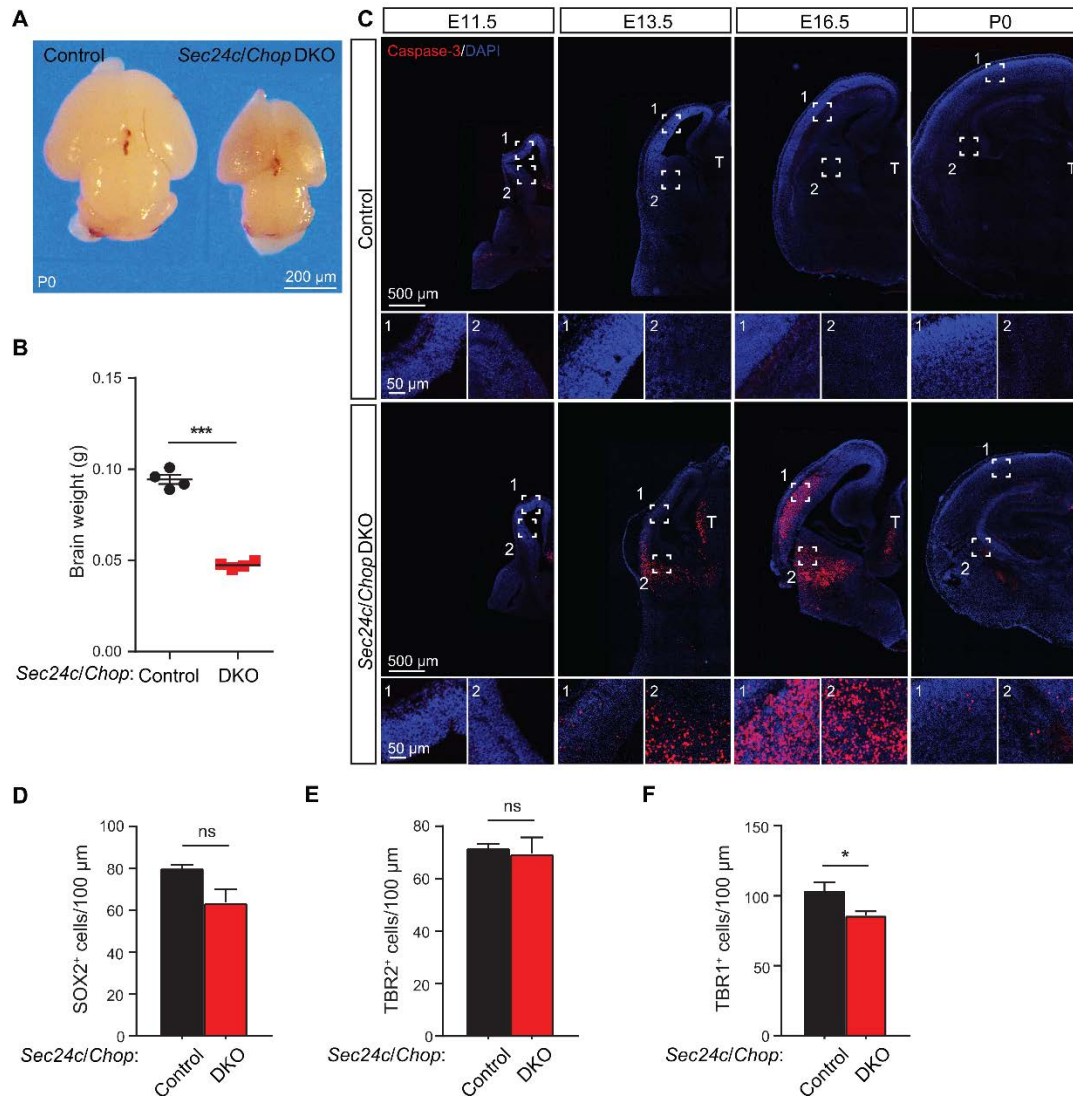

**Supplemental Figure 5. Related to Figure 6. (A)** Representative photograph of fixed brains dissected from control and *Sec24c<sup>Nes</sup>-cKO;Chop-KO* mice at P0. **(B)** Mean weight ( $\pm$  SEM) of fixed brains from *Sec24c<sup>Nes</sup>-cKO;Chop-KO* mice ( $n = 4$  mice/genotype) at P0. **(C)** Immunostaining against cleaved caspase-3 in cortical sections of control and *Sec24c<sup>Nes</sup>-cKO;Chop-KO* mice at E11.5, E13.5, E16.5, and P0. Areas from cortex (1) and striatum (2) are magnified. 3 mice were used for each genotype at each age. Average number ( $\pm$  SEM) of SOX2<sup>+</sup> **(D)**, TBR2<sup>+</sup> **(E)**, and TBR1<sup>+</sup> **(F)** cells in cortices of control and *Sec24c<sup>Nes</sup>-cKO;Chop-KO* mice at E16.5 show a specific reduction of TBR1<sup>+</sup> neurons in the brains from *Sec24c<sup>Nes</sup>-cKO;Chop-KO* mice ( $n = 3$  mice for each genotype). Abbreviations: DKO, double-knockout; ns, not significant; T, thalamus. \* $P < 0.05$ ; \*\*\* $P < 0.001$  (Student's  $t$ -test).

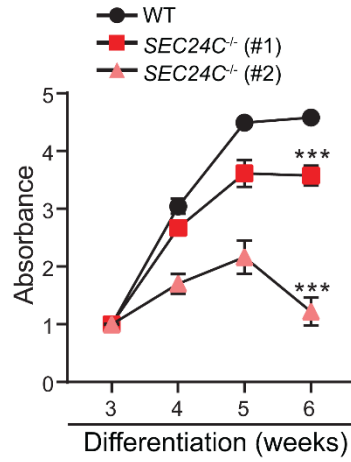

804

805 **Supplemental Figure 6. Related to Figure 7.** XTT cell viability assays on WT and *SEC24C*-KO hiPSCs  
 806 at 3, 4, 5, and 6 weeks of differentiation. Data collected from 3 independent experiments were presented  
 807 as mean  $\pm$  SEM. \*\*\* $P$  < 0.001 (two-way ANOVA).

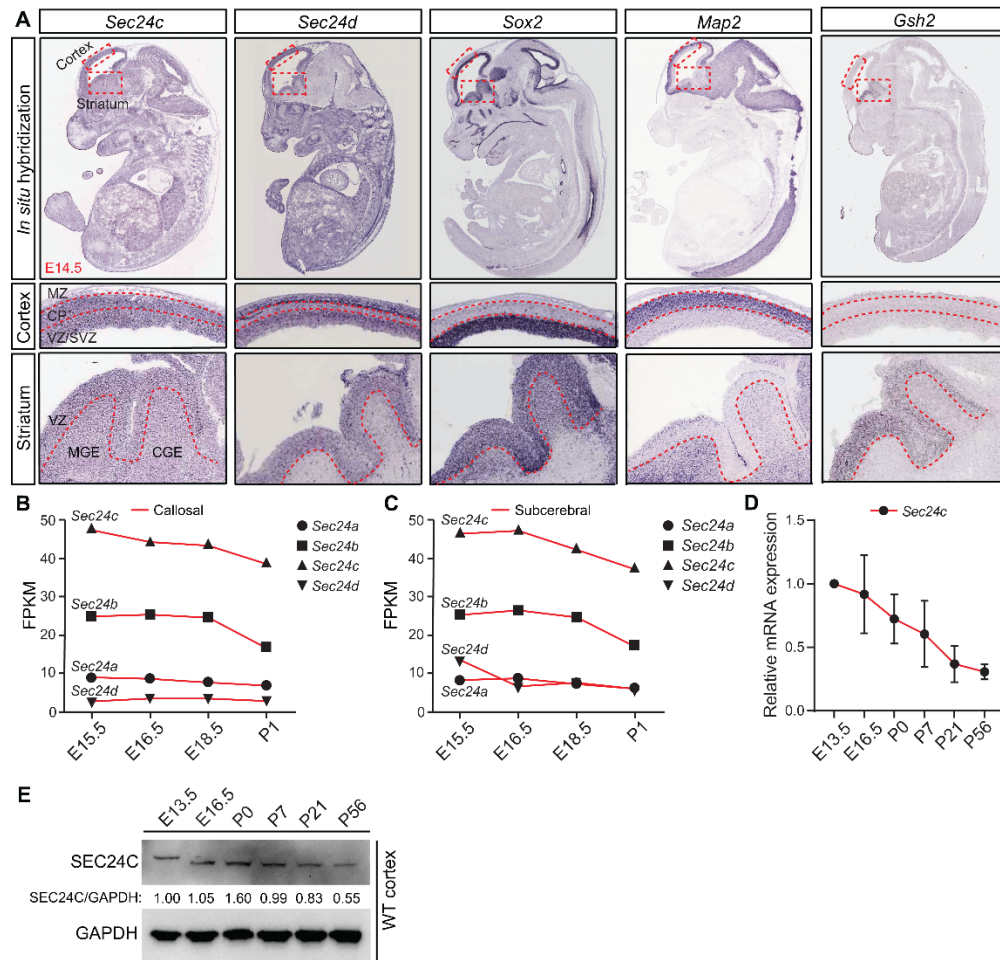

**Supplemental Figure 7. Related to Figure 8.** (A) Expression of *Sec24c*, *Sec24d*, *Sox2*, *Map2*, and *Gsh2* mRNA in the cortices of WT mice at E14.5 revealed by in situ hybridization (data from GenePaint: <http://www.genepaint.org/>). Areas from the cortex and striatum are magnified. (B, C) The mRNA levels of *Sec24a*, *Sec24b*, *Sec24c*, and *Sec24d* were determined by RNA-sequencing in callosal (Layer II-III) and subcerebral (Layer V) neurons at E15.5, E16.5, E18.5, and P1, respectively (data from DeCoN: <http://decon.fas.harvard.edu/pyramidal/>). (D, E) The mRNA and protein levels of SEC24C in the cortices of WT mice at different developmental stages, including E13.5, E16.5, P0, P7, P21, and P56, were analyzed by real-time RT-PCR (3 mice were used for each age) and immunoblotting (1 mouse were used for each age). Abbreviations: CGE, caudal ganglionic eminence; CP, cortical plate; FPKM, fragments per kilobase of transcript per million mapped reads; MGE, medial ganglionic eminence; MZ, marginal zone; VZ/SVZ, ventricular zone/subventricular zone.
